# Supplementary material
Source: PubMed Central journal article supplement (PMC6175641)
Supplement: NIHMS972527-supplement-1.pdf [file NIHMS972527-supplement-1.pdf]

*Epidemiology and Infection*

Geography but not alternative host species explain the spread of raccoon rabies virus in Vermont

Authors: S.A. NADIN-DAVIS, Q. FU, H. TREWBY, R. BIEK, R.H. JOHNSON and L. REAL

**Supplementary Material**

Supplementary Table S1. Summary of raccoon rabies cases reported by county in Vermont, 1994 - 2012

| Year         | 1994      | 1995       | 1996       | 1997       | 1998      | 1999      | 2000      | 2001      | 2002      | 2003      | 2004      | 2005      | 2006      | 2007       | 2008      | 2009      | 2010      | 2011      | 2012      | Total       |            |
|--------------|-----------|------------|------------|------------|-----------|-----------|-----------|-----------|-----------|-----------|-----------|-----------|-----------|------------|-----------|-----------|-----------|-----------|-----------|-------------|------------|
| County       |           |            |            |            |           |           |           |           |           |           |           |           |           |            |           |           |           |           |           |             |            |
| Addison      |           | 14         | 41         | 7          | 5         | 11        | 5         | 8         | 8         | 6         | 4         | 8         | 12        | 7          | 2         | 9         | 7         | 4         | 4         |             | <b>162</b> |
| Bennington   | 15        | 23         | 5          | 2          | 15        | 2         | 2         | 18        | 13        |           | 2         | 1         | 4         | 2          | 2         | 5         | 2         |           |           | 2           | <b>115</b> |
| Caledonia    |           |            |            |            | 10        | 5         | 2         |           |           |           |           | 15        | 12        | 11         |           | 1         | 1         | 3         | 10        |             | <b>70</b>  |
| Chittenden   |           |            | 12         | 85         | 14        | 6         | 6         | 3         | 6         | 11        | 4         | 1         | 4         | 27         | 9         | 10        | 15        | 6         | 13        |             | <b>232</b> |
| Essex        |           |            |            |            |           | 1         |           |           |           |           |           |           |           |            |           |           |           |           |           | 1           | <b>2</b>   |
| Franklin     |           |            |            | 1          | 6         | 2         | 4         |           |           |           |           |           | 7         | 85         | 10        | 3         |           |           |           | 2           | <b>120</b> |
| Grand Isle   |           |            |            | 1          |           |           |           |           |           |           |           |           |           | 7          | 9         | 3         | 1         |           |           |             | <b>21</b>  |
| Lamoille     |           |            |            |            |           | 5         | 7         | 2         | 2         | 1         |           |           | 9         | 6          | 5         | 3         | 1         | 1         | 11        |             | <b>53</b>  |
| Orange       |           |            | 3          | 2          | 2         | 5         | 4         | 1         | 2         | 4         | 5         | 5         | 7         | 9          | 2         |           | 1         |           | 4         |             | <b>56</b>  |
| Orleans      |           |            |            |            |           | 2         | 2         | 1         |           |           |           |           |           |            | 8         | 9         | 6         | 1         | 5         |             | <b>34</b>  |
| Rutland      | 6         | 24         | 7          | 4          | 4         | 11        | 7         | 5         | 17        | 2         | 3         | 1         | 11        | 2          |           | 1         | 8         | 2         | 2         |             | <b>117</b> |
| Washington   |           |            |            |            | 16        | 40        | 6         | 3         | 2         |           | 13        | 17        | 4         | 2          | 1         | 2         | 6         | 8         | 4         |             | <b>124</b> |
| Windham      | 5         | 63         | 6          |            |           |           | 2         | 13        | 30        | 9         | 4         |           |           | 3          | 21        | 10        |           |           | 1         | 2           | <b>169</b> |
| Windsor      |           | 10         | 31         | 10         |           |           | 6         | 5         | 9         | 1         | 6         |           | 2         | 1          | 3         | 8         | 6         |           |           | 1           | <b>99</b>  |
| Unknown      |           |            |            | 1          |           |           |           |           |           |           |           |           |           |            |           |           |           |           |           |             | <b>1</b>   |
| <b>Total</b> | <b>26</b> | <b>134</b> | <b>105</b> | <b>113</b> | <b>72</b> | <b>90</b> | <b>53</b> | <b>59</b> | <b>89</b> | <b>34</b> | <b>41</b> | <b>48</b> | <b>72</b> | <b>162</b> | <b>72</b> | <b>64</b> | <b>54</b> | <b>26</b> | <b>61</b> | <b>1375</b> |            |

Supplementary Table S2. RRV samples employed in this study.

| Designation  | Species | State | County      | Town         | Year recovered | Sequence type | Viral variant group* | GenBank Accession |
|--------------|---------|-------|-------------|--------------|----------------|---------------|----------------------|-------------------|
| MA.2003.5142 | Raccoon | MA    | unknown     | unknown      | 2003           | Illumina      | VI                   | MG562518          |
| NH.2003.5152 | Raccoon | NH    | unknown     | unknown      | 2003           | Illumina      | NY HIST (outlier)    | MG562519          |
| NH.2003.5154 | Raccoon | NH    | unknown     | unknown      | 2003           | Illumina      | VI                   | MG562520          |
| NJ.2004.1927 | Equine  | NJ    | unknown     | unknown      | 2004           | Illumina      | VI (outlier)         | MG562521          |
| NY.1990.2072 | Raccoon | NY    | Sullivan    | Tusten       | 1990           | Sanger        | NY HIST (VI outlier) | MG562523          |
| NY.1990.5015 | Raccoon | NY    | Orange      | Deer Park    | 1990           | Illumina      | NY HIST              | MG562524          |
| NY.1992.0394 | Raccoon | NY    | Westchester | Bedford      | 1992           | Illumina      | NY HIST              | MG562525          |
| NY.1995.0364 | Raccoon | NY    | Saratoga    | Malta        | 1995           | Illumina      | NY HIST              | MG562526          |
| NY.1995.3745 | Raccoon | NY    | Clinton     | Black Brook  | 1995           | Sanger        | NY HIST              | MF143291          |
| NY.2003.1734 | Raccoon | NY    | Rensselaer  | Nassau       | 2003           | Illumina      | VII                  | MG562527          |
| NY.2003.2059 | Raccoon | NY    | Saratoga    | Saratoga     | 2003           | Illumina      | IIIa                 | MG562528          |
| NY.2003.3040 | Raccoon | NY    | Saratoga    | Wilton       | 2003           | Illumina      | VII                  | MG562529          |
| NY.2003.7854 | Raccoon | NY    | Rensselaer  | Schaghticoke | 2003           | Illumina      | V                    | MG562530          |
| NY.2003.7914 | Raccoon | NY    | Albany      | Albany C.    | 2003           | Illumina      | VII                  | MG562531          |
| NY.2003.7917 | Skunk   | NY    | Saratoga    | Moreau       | 2003           | Illumina      | VII                  | MG562532          |
| NY.2003.7990 | Raccoon | NY    | Columbia    | Austerlitz   | 2003           | Illumina      | VII                  | MG562533          |
| NY.2004.1046 | Raccoon | NY    | Washington  | Kingsbury    | 2004           | Illumina      | IIIa                 | MG562534          |
| NY.2004.1247 | Raccoon | NY    | Rensselaer  | Pittstown    | 2004           | Illumina      | V                    | MG562535          |
| NY.2004.1705 | Raccoon | NY    | Albany      | Bethlehem    | 2004           | Sanger        | VII                  | MG562536          |
| NY.2004.2620 | Raccoon | NY    | Rensselaer  | Nassau       | 2004           | Illumina      | VII                  | MG562537          |
| NY.2004.4138 | Raccoon | NY    | Albany      | Westerlo     | 2004           | Sanger        | VII                  | MG562538          |
| NY.2004.5339 | Raccoon | NY    | Albany      | Coeymans     | 2004           | Illumina      | VII                  | MG562539          |
| NY.2004.6383 | Skunk   | NY    | Washington  | Greenwich    | 2004           | Illumina      | V                    | MG562540          |
| NY.2004.6937 | Skunk   | NY    | Washington  | White Creek  | 2004           | Illumina      | V                    | MG562541          |
| NY.2004.8403 | Raccoon | NY    | Washington  | Cambridge    | 2004           | Illumina      | V                    | MG562542          |
| NY.2010.0729 | Raccoon | NY    | Washington  | Jackson      | 2010           | Illumina      | IV                   | MG562543          |
| NY.2010.0775 | Raccoon | NY    | Rensselaer  | Berlin       | 2010           | Illumina      | VII                  | MG562544          |

|              |          |    |            |                  |      |          |          |          |
|--------------|----------|----|------------|------------------|------|----------|----------|----------|
| NY.2010.1098 | Skunk    | NY | Rensselaer | Troy City        | 2010 | Illumina | VII      | MG562545 |
| NY.2010.5433 | Raccoon  | NY | Saratoga   | Ballston         | 2010 | Illumina | VII      | MG562546 |
| NY.2011.0005 | Skunk    | NY | Albany     | Albany City      | 2011 | Illumina | VII      | MG562547 |
| NY.2011.0007 | Raccoon  | NY | Rensselaer | North Greenbush  | 2011 | Illumina | VII      | MG562548 |
| NY.2011.0042 | Raccoon  | NY | Albany     | Bethlehem        | 2011 | Illumina | VII      | MG562549 |
| NY.2011.0560 | Raccoon  | NY | Washington | Cambridge        | 2011 | Illumina | IIIa     | MG562550 |
| NY.2011.0714 | Gray Fox | NY | Saratoga   | Moreau           | 2011 | Illumina | IIIa     | MG562551 |
| NY.2011.1343 | Gray Fox | NY | Essex      | Westport         | 2011 | Illumina | Ib       | MG562552 |
| NY.2011.2001 | Raccoon  | NY | Essex      | Crown Point      | 2011 | Illumina | Ib       | MG562553 |
| NY.2011.4095 | Skunk    | NY | Essex      | Crown Point      | 2011 | Illumina | IIIa     | MG562554 |
| NY.2011.5590 | Skunk    | NY | Clinton    | Champlain        | 2011 | Illumina | IIIa     | MF143334 |
| VA.2003.5213 | Raccoon  | VA | unknown    | unknown          | 2003 | Illumina | outgroup | MG562522 |
| VT.2005.0142 | Raccoon  | VT | Caledonia  | Peacham          | 2005 | Sanger   | IIb      | MG562555 |
| VT.2005.0167 | Raccoon  | VT | Caledonia  | Peacham          | 2005 | Illumina | IIb      | MG562556 |
| VT.2005.0212 | Raccoon  | VT | Caledonia  | Barnet           | 2005 | Illumina | IIb      | MG562557 |
| VT.2005.0214 | Skunk    | VT | Orange     | Bradford         | 2005 | Illumina | IIb      | MG562558 |
| VT.2005.0215 | Raccoon  | VT | Washington | Cabot            | 2005 | Sanger   | IIa      | MF143373 |
| VT.2005.0270 | Raccoon  | VT | Washington | Barre Town       | 2005 | Illumina | IIa      | MG562559 |
| VT.2005.0274 | Raccoon  | VT | Orange     | Orange           | 2005 | Illumina | IIa      | MG562560 |
| VT.2005.0275 | Raccoon  | VT | Orange     | Newbury          | 2005 | Sanger   | IIb      | MG562561 |
| VT.2005.0277 | Raccoon  | VT | Rutland    | Rutland City     | 2005 | Illumina | IIIa     | MG562562 |
| VT.2005.0296 | Raccoon  | VT | Washington | Northfield       | 2005 | Illumina | IIIb     | MG562563 |
| VT.2006.0104 | Raccoon  | VT | Caledonia  | St. Johnsbury    | 2006 | Illumina | IIb      | MF143374 |
| VT.2006.0108 | Raccoon  | VT | Lamoille   | Stowe            | 2006 | Sanger   | IIIb     | MF143375 |
| VT.2006.0116 | Bovine   | VT | Caledonia  | Danville         | 2006 | Illumina | IIb      | MF143278 |
| VT.2006.0117 | Skunk    | VT | Chittenden | South Burlington | 2006 | Illumina | Ia       | MF143376 |
| VT.2006.0147 | Raccoon  | VT | Addison    | Leicester        | 2006 | Sanger   | Ib       | MG562564 |
| VT.2006.0153 | Skunk    | VT | Lamoille   | Stowe            | 2006 | Sanger   | IIIb     | MF143377 |
| VT.2006.0161 | Raccoon  | VT | Addison    | New Haven        | 2006 | Sanger   | Ib       | MG562565 |
| VT.2006.0166 | Raccoon  | VT | Rutland    | Clarendon        | 2006 | Illumina | IV       | MF143279 |
| VT.2006.0173 | Raccoon  | VT | Rutland    | Hubbardton       | 2006 | Sanger   | Ib       | MG562566 |

|              |           |    |            |                 |      |          |      |          |
|--------------|-----------|----|------------|-----------------|------|----------|------|----------|
| VT.2006.0178 | Skunk     | VT | Addison    | Panton          | 2006 | Illumina | IIIc | MF143280 |
| VT.2006.0218 | Skunk     | VT | Orange     | Chelsea         | 2006 | Sanger   | IIIb | MG562567 |
| VT.2006.0225 | Raccoon   | VT | Lamoille   | Stowe           | 2006 | Both     | IIIb | KY026478 |
| VT.2006.0245 | Raccoon   | VT | Caledonia  | Peacham         | 2006 | Illumina | IIb  | MG562568 |
| VT.2006.0259 | Skunk     | VT | Windsor    | Bethel          | 2006 | Sanger   | IIb  | KY026479 |
| VT.2006.0263 | Raccoon   | VT | Bennington | Dorset          | 2006 | Sanger   | IV   | MG562569 |
| VT.2006.0287 | Raccoon   | VT | Orange     | Corinth         | 2006 | Illumina | IIIb | MG562570 |
| VT.2006.0288 | Bovine    | VT | Addison    | Shoreham        | 2006 | Sanger   | IIIc | MG562571 |
| VT.2006.0289 | Raccoon   | VT | Rutland    | Mount Holly     | 2006 | Sanger   | IIIa | MG562572 |
| VT.2006.0325 | Raccoon   | VT | Bennington | Dorset          | 2006 | Illumina | IV   | MG562573 |
| VT.2006.0332 | Skunk     | VT | Addison    | Middlebury      | 2006 | Illumina | Ib   | MF143281 |
| VT.2006.0366 | Woodchuck | VT | Orange     | Bradford        | 2006 | Illumina | IIb  | MG562574 |
| VT.2007.0084 | Skunk     | VT | Chittenden | Burlington      | 2007 | Sanger   | Ia   | MF143378 |
| VT.2007.0092 | Raccoon   | VT | Caledonia  | Lyndon          | 2007 | Illumina | IIb  | MF143282 |
| VT.2007.0294 | Horse     | VT | Rutland    | Benson          | 2007 | Illumina | Ib   | MG562575 |
| VT.2007.0297 | Raccoon   | VT | Lamoille   | Stowe           | 2007 | Illumina | IIIb | MF143283 |
| VT.2007.0308 | Raccoon   | VT | Bennington | Pownal          | 2007 | Illumina | V    | MF143284 |
| VT.2007.0320 | Skunk     | VT | Chittenden | Williston       | 2007 | Illumina | Ia   | MF143285 |
| VT.2007.0342 | Raccoon   | VT | Franklin   | St. Albans City | 2007 | Sanger   | Ia   | MF143379 |
| VT.2007.0357 | Skunk     | VT | Washington | Barre Town      | 2007 | Illumina | IIIb | MG562576 |
| VT.2007.0380 | Raccoon   | VT | Franklin   | Fairfield       | 2007 | Sanger   | Ia   | MF143380 |
| VT.2007.0392 | Raccoon   | VT | Chittenden | Burlington      | 2007 | Sanger   | Ia   | MF143381 |
| VT.2007.0398 | Skunk     | VT | Franklin   | Georgia         | 2007 | Sanger   | Ia   | MF143382 |
| VT.2007.0412 | Raccoon   | VT | Chittenden | Essex           | 2007 | Illumina | Ia   | MF143286 |
| VT.2007.0417 | Skunk     | VT | Orange     | Bradford        | 2007 | Illumina | IIb  | MG562577 |
| VT.2007.0465 | Skunk     | VT | Franklin   | Sheldon         | 2007 | Sanger   | Ia   | MF143383 |
| VT.2007.0473 | Raccoon   | VT | Windham    | Rockingham      | 2007 | Sanger   | VIa  | MG562578 |
| VT.2007.0479 | Skunk     | VT | Franklin   | Swanton         | 2007 | Sanger   | Ia   | MF143384 |
| VT.2007.0489 | Raccoon   | VT | Grand isle | North Hero      | 2007 | Sanger   | Ia   | MF143385 |
| VT.2007.0491 | Skunk     | VT | Franklin   | Franklin        | 2007 | Sanger   | Ia   | MF143337 |
| VT.2007.0492 | Raccoon   | VT | Caledonia  | Danville        | 2007 | Illumina | IIb  | MF143287 |
| VT.2007.0496 | Raccoon   | VT | Caledonia  | Danville        | 2007 | Sanger   | IIb  | MF143386 |
| VT.2007.0505 | Skunk     | VT | Caledonia  | Danville        | 2007 | Sanger   | IIb  | MF143387 |

|              |         |    |            |             |      |          |      |          |
|--------------|---------|----|------------|-------------|------|----------|------|----------|
| VT.2007.0506 | Skunk   | VT | Franklin   | Georgia     | 2007 | Sanger   | Ia   | MF143388 |
| VT.2007.0512 | Skunk   | VT | Franklin   | Sheldon     | 2007 | Sanger   | Ia   | MF143389 |
| VT.2007.0520 | Skunk   | VT | Addison    | Bridport    | 2007 | Illumina | VIII | MG562579 |
| VT.2007.0522 | Raccoon | VT | Orange     | Braintree   | 2007 | Illumina | IIb  | KY026480 |
| VT.2007.0523 | Skunk   | VT | Franklin   | Franklin    | 2007 | Sanger   | Ia   | MF143390 |
| VT.2008.0041 | Raccoon | VT | Windsor    | Windsor     | 2008 | Sanger   | VIc  | MG562580 |
| VT.2008.0111 | Raccoon | VT | Windham    | Townshend   | 2008 | Sanger   | VIa  | MG562581 |
| VT.2008.0170 | Skunk   | VT | Bennington | Bennington  | 2008 | Sanger   | V    | MG562582 |
| VT.2008.0180 | Raccoon | VT | Windham    | Wardsboro   | 2008 | Illumina | VIa  | MG562583 |
| VT.2008.0205 | Skunk   | VT | Windsor    | Chester     | 2008 | Sanger   | IIIa | MG562584 |
| VT.2008.0209 | Raccoon | VT | Chittenden | Charlotte   | 2008 | Sanger   | VIII | KY026481 |
| VT.2008.0233 | Skunk   | VT | Washington | Moretown    | 2008 | Sanger   | IIa  | MG562585 |
| VT.2008.0237 | Raccoon | VT | Lamoille   | Stowe       | 2008 | Sanger   | Ia   | KY026482 |
| VT.2008.0270 | Skunk   | VT | Lamoille   | Elmore      | 2008 | Illumina | IIIb | MF143288 |
| VT.2008.0275 | Skunk   | VT | Addison    | Bristol     | 2008 | Illumina | Ib   | MG562586 |
| VT.2008.0277 | Skunk   | VT | Orange     | Randolph    | 2008 | Illumina | IIIb | MG562587 |
| VT.2008.0283 | Skunk   | VT | Orange     | Newbury     | 2008 | Sanger   | IIb  | MG562588 |
| VT.2008.0296 | Raccoon | VT | Windham    | Dover       | 2008 | Sanger   | VIa  | MG562589 |
| VT.2008.0310 | Bovine  | VT | Franklin   | Bakersfield | 2008 | Sanger   | Ia   | MF143391 |
| VT.2008.0536 | Raccoon | VT | Bennington | Bennington  | 2008 | Sanger   | V    | MG562590 |
| VT.2008.0704 | Raccoon | VT | Windham    | Westminster | 2008 | Sanger   | VIa  | MG562591 |
| VT.2008.0764 | Raccoon | VT | Windham    | Rockingham  | 2008 | Illumina | VIa  | MG562592 |
| VT.2009.0023 | Skunk   | VT | Windsor    | Royalton    | 2009 | Sanger   | IIIb | MG562593 |
| VT.2009.0036 | Skunk   | VT | Franklin   | Fairfax     | 2009 | Sanger   | Ia   | MF143392 |
| VT.2009.0092 | Raccoon | VT | Grand Isle | South Hero  | 2009 | Illumina | Ia   | MF143393 |
| VT.2009.0093 | Skunk   | VT | Orleans    | Craftsbury  | 2009 | Illumina | IIb  | MF143394 |
| VT.2009.0124 | Skunk   | VT | Chittenden | Williston   | 2009 | Illumina | Ib   | MF143395 |
| VT.2009.0134 | Skunk   | VT | Caledonia  | Sheffield   | 2009 | Illumina | IIb  | MF143396 |
| VT.2009.0136 | Raccoon | VT | Chittenden | Essex       | 2009 | Illumina | Ia   | MF143397 |
| VT.2009.0137 | Horse   | VT | Windsor    | Hartford    | 2009 | Sanger   | VIc  | MG562594 |
| VT.2009.0146 | Raccoon | VT | Orleans    | Craftsbury  | 2009 | Illumina | IIb  | MF143398 |
| VT.2009.0164 | Raccoon | VT | Franklin   | Franklin    | 2009 | Illumina | Ia   | MF143399 |
| VT.2009.0169 | Skunk   | VT | Chittenden | Shelburne   | 2009 | Illumina | Ib   | MF143400 |
| VT.2009.0191 | Raccoon | VT | Chittenden | Charlotte   | 2009 | Illumina | Ia   | MG562595 |

|              |          |    |            |                  |      |          |      |          |
|--------------|----------|----|------------|------------------|------|----------|------|----------|
| VT.2009.0194 | Raccoon  | VT | Chittenden | Williston        | 2009 | Illumina | Ia   | MF143401 |
| VT.2009.0322 | Gray Fox | VT | Windham    | Putney           | 2009 | Sanger   | VIb  | MG562596 |
| VT.2009.0335 | Raccoon  | VT | Windham    | Townshend        | 2009 | Sanger   | VIb  | MG562597 |
| VT.2009.0346 | Raccoon  | VT | Addison    | Vergennes        | 2009 | Sanger   | Ia   | MG562598 |
| VT.2009.0352 | Raccoon  | VT | Grand Isle | Grand Isle       | 2009 | Sanger   | Ia   | MF143402 |
| VT.2009.0353 | Raccoon  | VT | Bennington | Bennington       | 2009 | Illumina | VII  | MG562599 |
| VT.2009.0361 | Raccoon  | VT | Windsor    | Hartford         | 2009 | Sanger   | VIc  | MG562600 |
| VT.2009.0370 | Raccoon  | VT | Lamoille   | Stowe            | 2009 | Illumina | Ia   | MF143289 |
| VT.2009.0371 | Cow      | VT | Orleans    | Barton           | 2009 | Sanger   | IIb  | MF143403 |
| VT.2009.0377 | Raccoon  | VT | Windham    | Dover            | 2009 | Illumina | VIa  | MG562601 |
| VT.2009.0384 | Raccoon  | VT | Windsor    | Baltimore        | 2009 | Sanger   | IIIa | MG562602 |
| VT.2009.0393 | Cow      | VT | Addison    | Addison          | 2009 | Sanger   | Ib   | MG562603 |
| VT.2009.0397 | Cow      | VT | Orleans    | Greensboro       | 2009 | Sanger   | IIb  | MF143338 |
| VT.2009.0406 | Raccoon  | VT | Bennington | Dorset           | 2009 | Illumina | IV   | MG562604 |
| VT.2009.0423 | Raccoon  | VT | Orleans    | Greensboro       | 2009 | Sanger   | IIb  | MF143404 |
| VT.2009.0428 | Raccoon  | VT | Franklin   | Franklin         | 2009 | Sanger   | Ia   | MF143405 |
| VT.2009.0443 | Cow      | VT | Lamoille   | Hyde Park        | 2009 | Sanger   | IIIb | MF143406 |
| VT.2009.0475 | Skunk    | VT | Chittenden | Charlotte        | 2009 | Sanger   | Ib   | MG562605 |
| VT.2009.0500 | Raccoon  | VT | Bennington | Manchester       | 2009 | Sanger   | IV   | MG562606 |
| VT.2010.0003 | Gray Fox | VT | Bennington | Bennington       | 2010 | Illumina | VII  | MG562607 |
| VT.2010.0044 | Skunk    | VT | Chittenden | Burlington       | 2010 | Illumina | Ia   | MF143407 |
| VT.2010.0054 | Raccoon  | VT | Chittenden | South Burlington | 2010 | Illumina | Ia   | MF143408 |
| VT.2010.0070 | Skunk    | VT | Chittenden | Hinesburg        | 2010 | Illumina | Ib   | MG562608 |
| VT.2010.0089 | Raccoon  | VT | Chittenden | Burlington       | 2010 | Illumina | Ia   | MF143409 |
| VT.2010.0090 | Skunk    | VT | Chittenden | Winooski         | 2010 | Illumina | Ia   | MF143410 |
| VT.2010.0093 | Skunk    | VT | Chittenden | Winooski         | 2010 | Illumina | Ia   | MF143411 |
| VT.2010.0145 | Skunk    | VT | Orleans    | Craftsbury       | 2010 | Illumina | IIb  | MF143412 |
| VT.2010.0172 | Skunk    | VT | Chittenden | South Burlington | 2010 | Illumina | Ia   | MF143339 |
| VT.2010.0246 | Gray Fox | VT | Addison    | Middlebury       | 2010 | Illumina | Ib   | MG562609 |
| VT.2010.0370 | Skunk    | VT | Chittenden | Burlington       | 2010 | Illumina | Ia   | MF143413 |
| VT.2011.0079 | Skunk    | VT | Chittenden | Burlington       | 2011 | Illumina | Ia   | MF143414 |
| VT.2011.0122 | Skunk    | VT | Caledonia  | Walden           | 2011 | Both     | Ia   | KY026483 |

|              |         |    |            |            |      |          |     |          |
|--------------|---------|----|------------|------------|------|----------|-----|----------|
| VT.2011.0138 | Skunk   | VT | Orleans    | Derby      | 2011 | Illumina | IIb | MF143340 |
| VT.2011.0145 | Skunk   | VT | Caledonia  | Ryegate    | 2011 | Illumina | VIc | MG562610 |
| VT.2011.0198 | Raccoon | VT | Chittenden | Burlington | 2011 | Illumina | Ib  | MF143415 |

\*as described in the main text, NY HIST refers to New York historical isolates from the 1990s.



Supplementary Table S3. Additional sequences used for the phylogenetic analysis illustrated in Supplementary Figure 1.

| Sample designation | State origin | County       | Year of collection | Accession number: N gene | Accession number: G gene |
|--------------------|--------------|--------------|--------------------|--------------------------|--------------------------|
| RRV_MA.1992.SM1630 | MA           | Worcester    | 1992               | DQ886050                 | DQ888343                 |
| RRV_NH.1992.SM1547 | NH           | Grafton      | 1992               | DQ886055                 | DQ888348                 |
| RRV_NH.1992.SM1642 | NH           | Hillsboro    | 1992               | DQ886054                 | DQ888347                 |
| RRV_NH.1992.SM1676 | NH           | Rockingham   | 1992               | DQ886056                 | DQ888349                 |
| RRV_NJ.2003.SM6407 | NJ           | Sussex       | 2003               | DQ886058                 | DQ888351                 |
| RRV_NY.2003.1584   | NY           | Westchester  | 2003               | DQ886041                 | DQ888334                 |
| RRV_NY.2003.1642   | NY           | Otsego       | 2003               | DQ886043                 | DQ888336                 |
| RRV_NY.2003.1847   | NY           | Genesee      | 2003               | DQ886044                 | DQ888337                 |
| RRV_VA.1984.SM1748 | VA           | Spotsylvania | 1984               | DQ886062                 | DQ888355                 |
| RRV_VT.1994.SM2692 | VT           | Bennington   | 1994               | DQ886069                 | DQ888362                 |

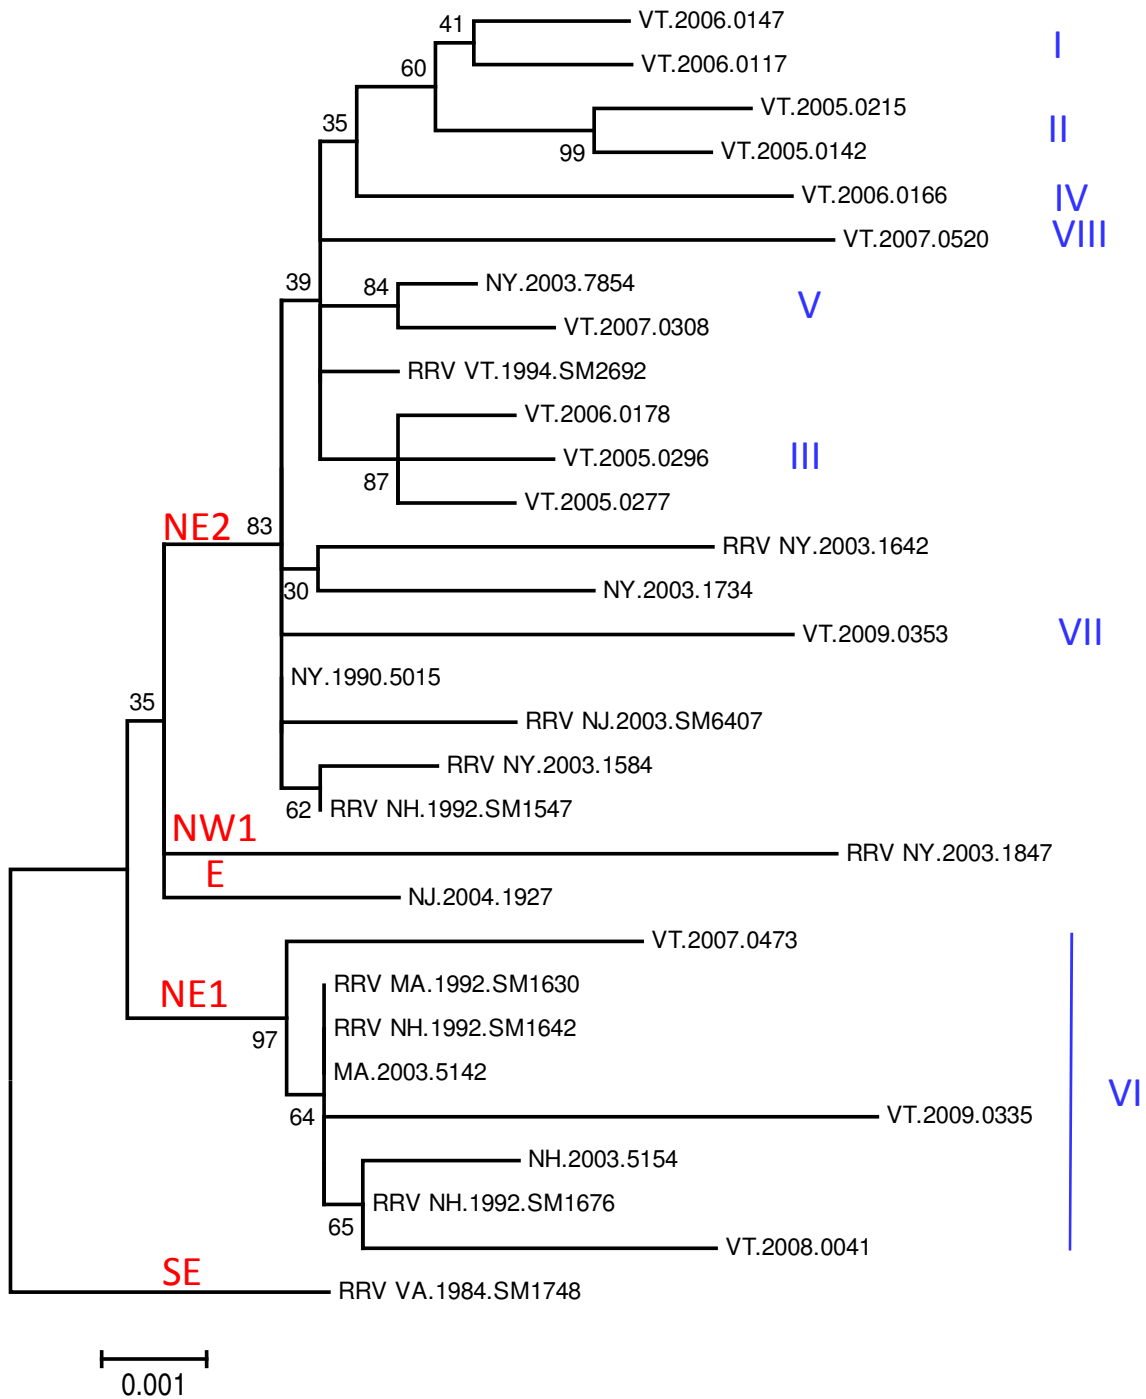

Supplementary Figure S1. Concatenated N and G gene sequences were used for a ML analysis employing 1000 bootstrap replicates. Viral groupings as described in this report are shown in blue to the right of the tree while clades previously identified by Biek et al. [8] are identified in red along the main branches. Bootstrap values are indicated at several nodes.
